# Supplementary material for: CD69 Blockade Restores the Bone Marrow Niche and Delays Leukemogenesis in a Mouse Model of NrasG12D-driven Chronic Myelomonocytic Leukemia
Source: Research Square preprint supplement (doi:10.21203/rs.3.rs-8277899/v1), 2025-12-13
Supplement: Supplementary file 1 [file d6fec526b9a9369afa7ad6c4.docx]

**Supplementary Fig. 1** **(a)** Mouse genotyping results. The figure illustrates that the DNA band sizes for *Nras*/+ mice are 487 bp and 345 bp, indicating a heterozygous state. The DNA band size for *VavCre* mice is 236 bp, indicating the expression of Cre recombinase. **(b)** Bar chart illustrating the proportion of CD11b+ cells in PB, SP, and BM of CMML and WT mice (n = 15). **(c)** Dynamic monitoring of the proportion of CD11b+ cells in the PB of mice each month after birth. Data are presented as mean ± SD (n = 5). **(d)** Flow cytometry plots and bar charts illustrating the gating strategy and the ratio of CD3+CD4+ T cells, CD3+CD8+ T cells, and Treg cells in the BM of WT, *Nras*+/-*VavCre* and *Nras*+/-*Lyz2Cre* mice (n = 6).

**Supplementary Fig. 2** **(a)** Upper: Comparison of the color of femurs and tibias from mice in WT, CMML, and Anti-CD69 groups. Lower: Comparison of centrifuged BM cells from mice in WT, CMML, and Anti-CD69 groups. **(b)** Upper: Flow cytometry plot illustrating the gating strategy for sorting LK+LSK cells from the BM of mice. Lower: Flow cytometry plot illustrating the gating strategy for purity assessment of sorted LK+LSK cells from the BM of mice. **(c)** Violin plot illustrating CD69 expression on LK+LSK cells in the BM of mice in WT, CMML, and Anti-CD69 groups (n = 3). **(d)** PPI network interaction analysis diagram of all interacting proteins in CMML and WT groups, illustrating 20 CD69 interacting proteins. The thickness of the lines represents the strength of interaction, with thicker lines indicating stronger interactions. **(e)** PPI network interaction analysis diagram of upregulated proteins in the CMML group and the WT group, illustrating 16 upregulated proteins. Thicker lines indicate greater interactions. **(f)** PPI network interaction analysis diagram of all interacting proteins in the Anti-CD69 group and the CMML group, illustrating seven CD69 interacting proteins. Thicker lines indicate greater interactions. **(g)** PPI network interaction analysis diagram of downregulated interacting proteins in the Anti-CD69 group and the CMML group, illustrating two downregulated proteins. Thicker lines indicate greater interactions.

**Supplementary Fig. 3** Flow cytometry plots and bar charts illustrating the gating strategy and the ratio of CD4+ T and CD8+ T cells in the BM of WT, CMML, and Anti-CD69 groups (WT = 19, CMML = 23, Anti-CD69 = 18).



**Supplementary Fig. 1**

**Supplementary Fig. 2**





**Supplementary Figure 3.**
